# Supplementary material for: Serum immuno-oncology markers carry independent prognostic information in patients with newly diagnosed metastatic breast cancer, from a prospective observational study
Source: Springer Nature journal article supplement (doi:10.1186/s13058-023-01631-6), 2023-03-21
Supplement: MOESM1 [file 24657094]

**Additional File 1**

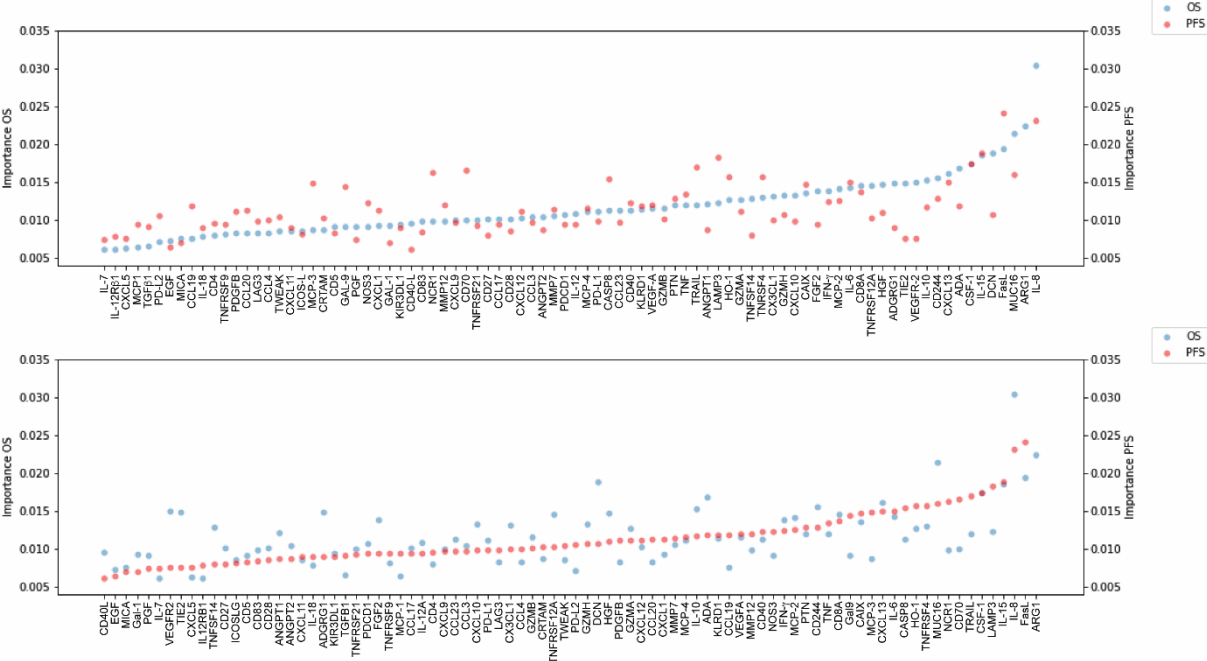

**Supplementary figure 1.** Serum protein feature importance scores for survival prediction. Random forest analyses used to rank serum proteins by importance for predicting survival. Importance score scale organized in order of importance for overall survival (OS; blue dots) shown in upper panel and importance score scale organized in order of importance for progression-free survival (PFS; red dots) shown in lower panel for each serum protein.
