# Supplementary material for: Serum immuno-oncology markers carry independent prognostic information in patients with newly diagnosed metastatic breast cancer, from a prospective observational study
Source: Springer Nature journal article supplement (doi:10.1186/s13058-023-01631-6), 2023-03-21
Supplement: MOESM2 [file 24657094]

## Additional File 2

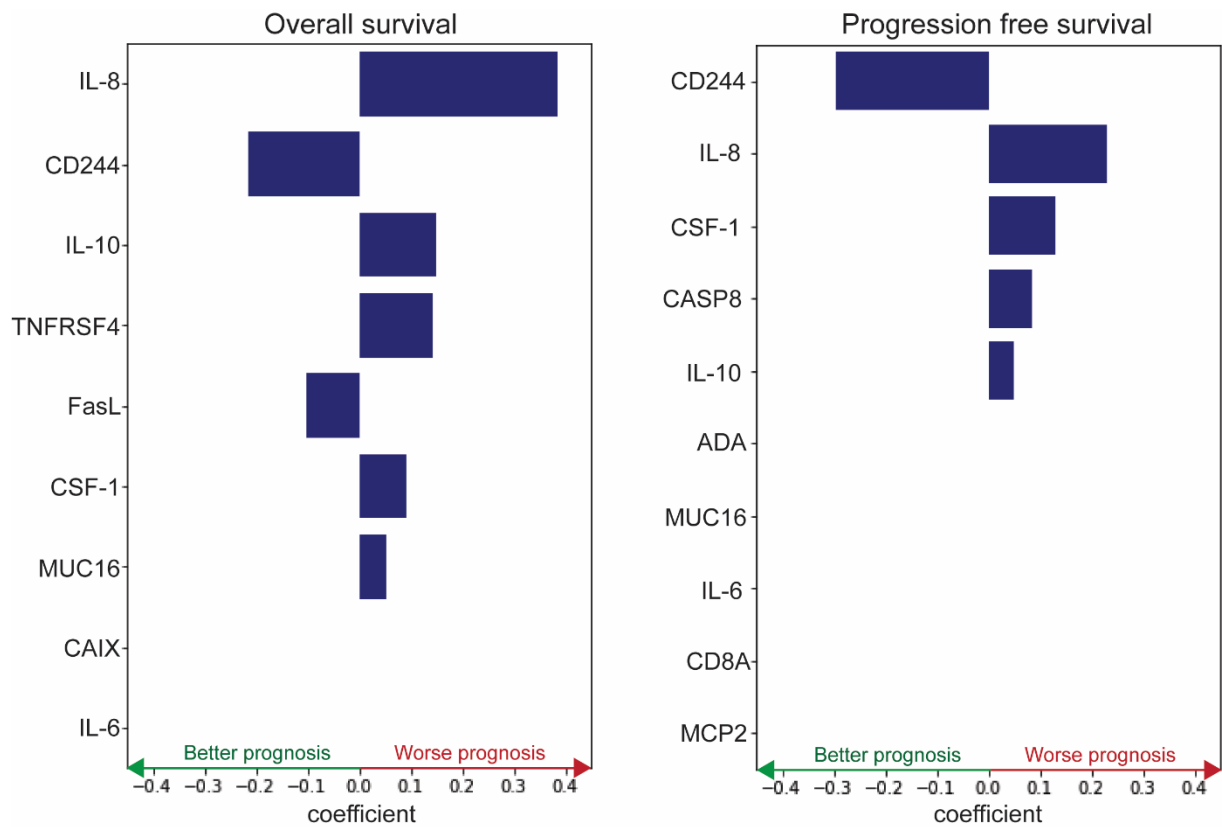

**Supplementary figure 2.** Cox penalized regression using Elastic Nets, identifying variable weights among the top variables for overall survival (left) and progression free survival (right).
