# Supplementary material for: Serum immuno-oncology markers carry independent prognostic information in patients with newly diagnosed metastatic breast cancer, from a prospective observational study
Source: Springer Nature journal article supplement (doi:10.1186/s13058-023-01631-6), 2023-03-21
Supplement: MOESM4 [file 24657094]

## Additional File 4

**Supplementary table 1.** Ranking score from each model used, for top 9 serum proteins predicting OS

| <b>Protein</b> | <b>RF</b> | <b>CR</b> | <b>RSF</b> | <b>CPR</b> | <b>CPRU</b> |
|----------------|-----------|-----------|------------|------------|-------------|
| CAIX           | 22        | 16        | 5          | 8          | 8           |
| CD244          | 10        | 45        | 2          | 2          | 6           |
| CSF-1          | 7         | 4         | 10         | 6          | 2           |
| FasL           | 4         | 24        | 4          | 5          | 4           |
| IL-6           | 18        | 5         | 9          | 9          | 9           |
| IL-8           | 1         | 2         | 3          | 1          | 1           |
| IL-10          | 11        | 7         | 7          | 3          | 7           |
| MUC16          | 3         | 1         | 1          | 7          | 3           |
| TFNSFR4        | 26        | 20        | 6          | 4          | 5           |

RF, Random Forest; CR, Cox Regression; RSF, Random Survival Forest; CPR, Cox Penalized Regression; CPRU, Cox Penalized Regression Unregressed.
