# Supplementary material for: Serum immuno-oncology markers carry independent prognostic information in patients with newly diagnosed metastatic breast cancer, from a prospective observational study
Source: Springer Nature journal article supplement (doi:10.1186/s13058-023-01631-6), 2023-03-21
Supplement: MOESM5 [file 24657094]

## Additional File 5

**Supplementary table 2.** Ranking score from each model used, for top 10 serum proteins predicting PFS

| <b>Protein</b> | <b>RF</b> | <b>CR</b> | <b>RSF</b> | <b>CPR</b> | <b>CPRU</b> |
|----------------|-----------|-----------|------------|------------|-------------|
| ADA            | 31        | 13        | 4          | 6          | 6           |
| CASP8          | 13        | 5         | 7          | 4          | 4           |
| CD244          | 21        | 9         | 3          | 1          | 1           |
| CD8A           | 19        | 55        | 9          | 9          | 9           |
| CSF-1          | 6         | 8         | 8          | 3          | 2           |
| IL-6           | 14        | 7         | 6          | 8          | 8           |
| IL-8           | 3         | 1         | 1          | 2          | 3           |
| IL-10          | 32        | 14        | 2          | 5          | 5           |
| MCP2           | 23        | 71        | 10         | 10         | 10          |
| MUC16          | 10        | 2         | 5          | 7          | 7           |

RF, Random Forest; CR, Cox Regression; RSF, Random Survival Forest; CPR, Cox Penalized Regression; CPRU, Cox Penalized Regression Unregressed.
